# Supplementary material
Source: bioRxiv or medRxiv preprint supplement (https://medrxiv.org/content/medrxiv/early/2023/09/14/2023.09.07.23295190/DC6/embed/media-6.pdf)
Supplement: Supplementary file [file media-6.pdf]

supernatant

cells

anti-actin

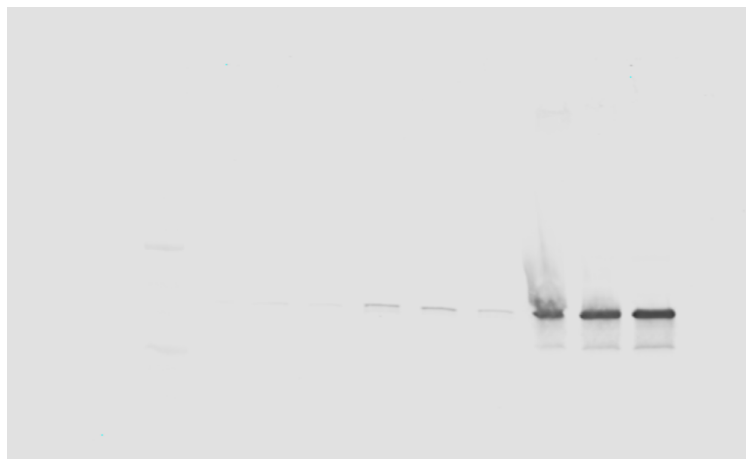

anti-actin  
+ anti-IL1 $\beta$

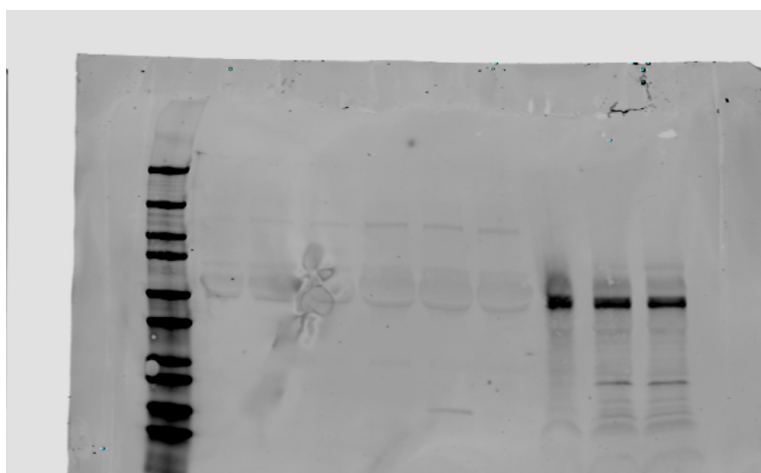

marker - LPS IFN - LPS IFN - LPS IFN

nigericin
